# Supplementary material for: Yeast “Make-Accumulate-Consume” Life Strategy Evolved as a Multi-Step Process That Predates the Whole Genome Duplication
Source: PLOS journal article supplement (doi:10.1371/journal.pone.0068734), 2013-07-15

**Biomass yield vs. Glucose cons. rates**

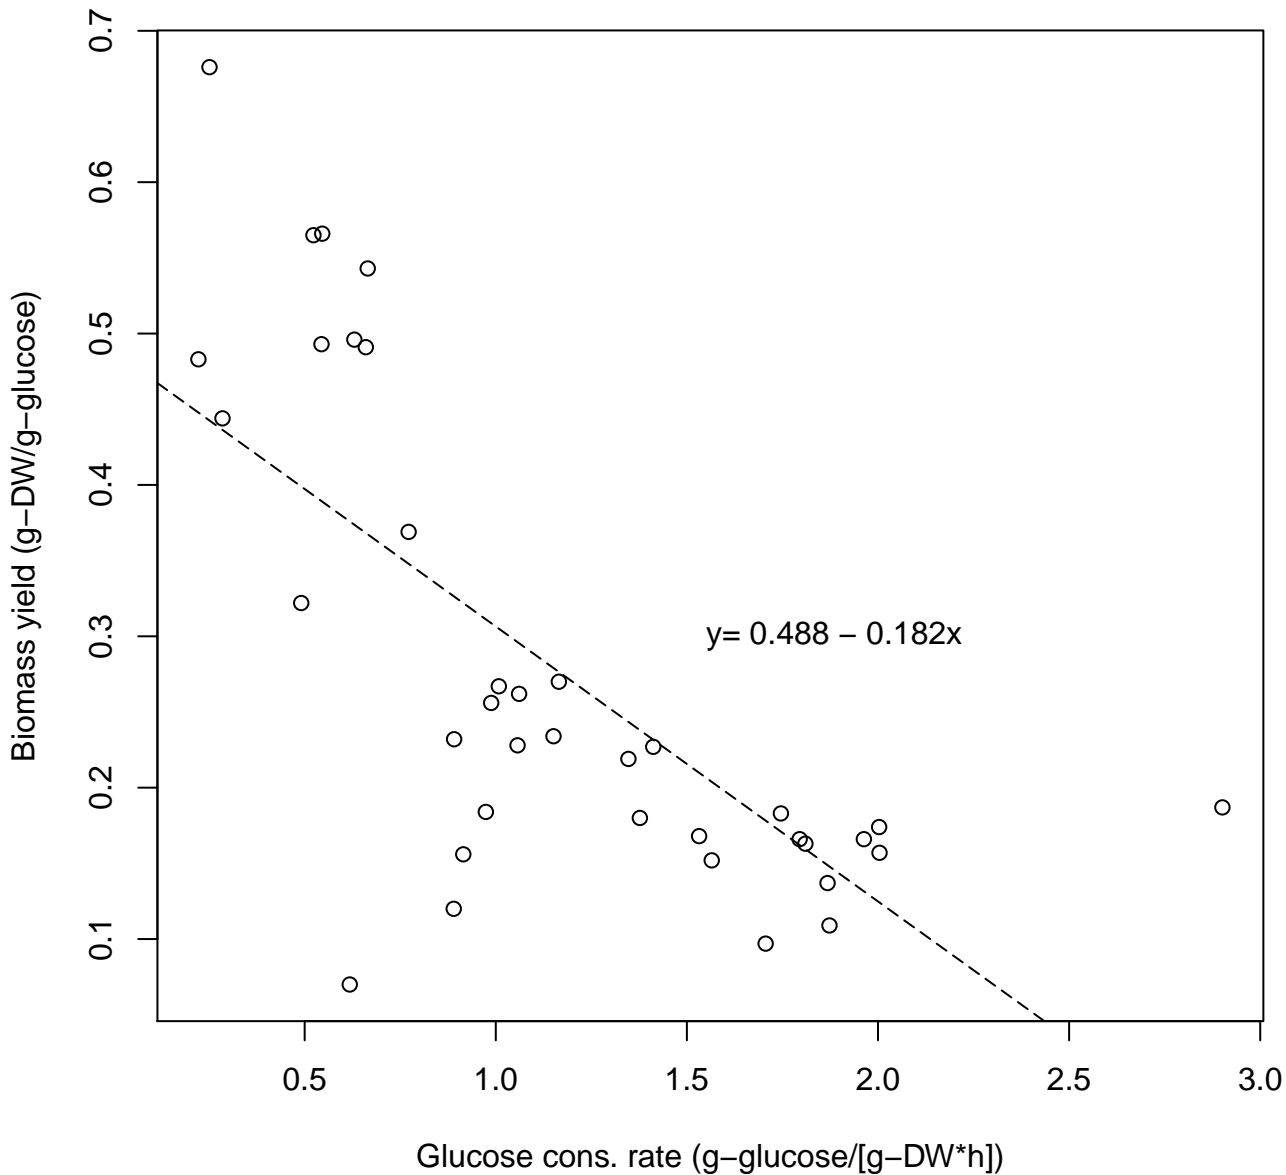

Supplement: S4 (10.1371/journal.pone.0068734.s004) [file journal.pone.0068734.s004]
